# Supplementary material for: Contextual Augmentation Based on Metric-Guided Features for Ocular Axial Length Prediction
Source: MDPI journal article supplement (doi:10.3390/math11133021), 2023-07-07
Supplement: s1 [file s1]

Archive with 1 entries (1 files):
- mathematics-2452905-supplementary.pdf
